# Supplementary material
Source: Springer Nature journal article supplement (https://www.springermedizin.de/resource/supplementary/12894_2006_93_MOESM8_ESM.pdf/9513944)

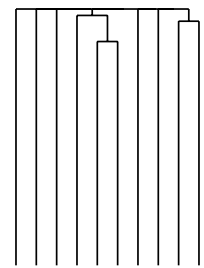

XFD-3/V\$XFD3\_01  
 E2/V\$E2\_01  
 E2F/V\$E2F\_02  
 NF-kappaB/V\$NFkB\_Q6  
 HNF-4/V\$HNF4\_01  
 c-Rel/V\$CREL\_01  
 E2/V\$E2\_Q6  
 E2F/V\$E2F\_01  
 Barbie Box/V\$BARBIE\_01  
 v-Myb/V\$VMYB\_01

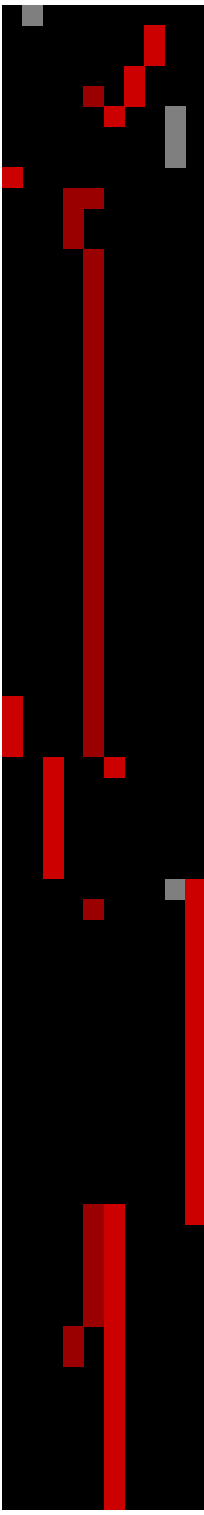

- M89641 (Ifnar1)
- D38258 (Fgf9)
- D87747 (Cxcr4)
- AF020738 (Fgf12)
- J04113 (Nr4a1)
- M64796 (Rag2)
- J04843 (Epor)
- X53532 (Prkcb1)
- AF109179 (Ccnt1)
- M91236 (Gjb5)
- U80036 (Pitx2)
- M24086 (Sag)
- Y07960 (Barx1)
- U51907 (Tank)
- Z48538 (Stat5a)
- M58588 (Klkb1)
- X95346 (Plcg1)
- X58876 (Mdm2)
- M88127 (Apc)
- M81591 (Mme)
- U46155 (Ptch1)
- M25811 (AI875142)
- U51866 (Csnk2a1)
- M32502 (Wnt3)
- AF039601 (Tgfbfr3)
- X59927 (Fgfr4)
- M11434 (Klk11)
- U10551 (Gem)
- U39391 (Htrl1a)
- M74541 (Cdh15)
- L36435 (Mafb)
- U71208 (Eya2)
- M83184 (Dlx2)
- U81983 (Epas1)
- M94087 (Atf4)
- D10475 (Epim)
- X95346 (Plcg1)
- U88327 (Socs2)
- AJ002636 (Stag2)
- U46923 (2810454H06Rik)
- D64107 (Dmc1h)
- U46684 (Cutl1)
- D30743 (Wee1)
- AF042822 (St14)
- X63099 (Gjb3)
- U06924 (Stat1)
- U43788 (Pou2af1)
- X56135 (Ptma)
- U17985 (Cnr1)
- AB009377 (Dffb)
- M89799 (Wnt5b)
- X80992 (Bmp6)
- AJ000262 (Hap1)
- L04302 (Thbs3)
- AF091432 (Ccne2)
- U47543 (Nab2)
- M80840 (Ndn)
- U11763 (Slc1a2)
- AF039567 (Miz1)
- X56135 (Ptma)
- M11434 (Klk11)
- M11434 (Klk11)
- M11434 (Klk11)
- M95106 (Creb1)
- M11434 (Klk11)
- U45665 (Cutl2)
- X53798 (Cxcl2)
- S50200 (Dbh)
- M33385 (Ntrk2)
- X06203 (Il6)
- U59463 (Casp4)
- D32167 (Zic1)
- U61112 (Eya3)
- L14935 (Nrl)

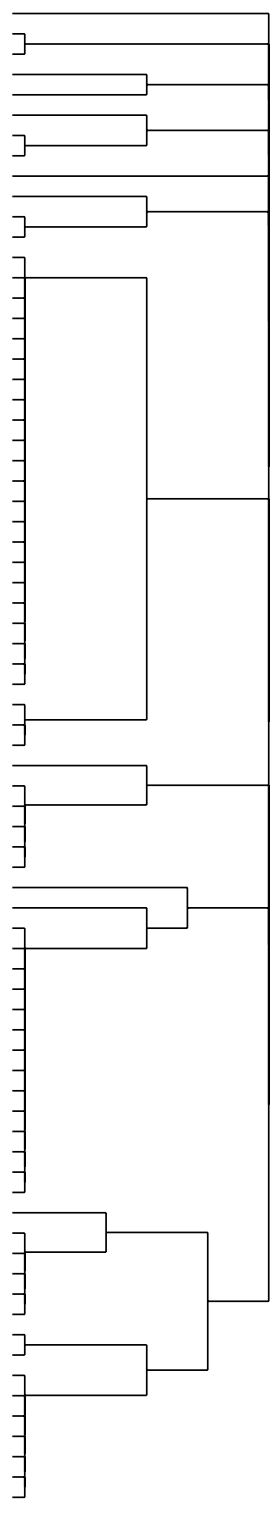

Supplement: MOESM8 [file 9513944]
